# Supplementary material for: The effect of low temperature on poly(3-methyl-N-vinylcaprolactam)-b-poly(N-vinylpyrrolidone) diblock copolymer nanovesicles assembled from all-aqueous media
Source: Royal Society of Chemistry journal article supplement (doi:10.1039/d4ma00831f), 2024-01-01
Supplement: d4ma00831f1.pdf [file d4ma00831f1.pdf]

Electronic Supporting Information for

The effect of low temperature on poly(3-methyl-*N*-vinylcaprolactam)-*b*-poly(*N*-vinylpyrrolidone) diblock copolymer nanovesicles assembled from all-aqueous media

*Veronika Kozlovskaya,<sup>1&</sup> Yiming Yang,<sup>1&</sup> Shuo Qian,<sup>2</sup> Eugenia Kharlampieva,<sup>1,3\*</sup>*

<sup>1</sup> Chemistry Department, the University of Alabama at Birmingham, Birmingham, Alabama, 35294, United States

<sup>2</sup> Neutron Scattering Division, Neutron Sciences Directorate, Oak Ridge National Laboratory, Oak Ridge, Tennessee 37831, United States

<sup>3</sup> Center for Nanoscale Materials and Biointegration, the University of Alabama at Birmingham, Birmingham, Alabama, United States, 35294

& The authors equally contributed to this work.

\*Correspondence to be addressed: [ekharlam@uab.edu](mailto:ekharlam@uab.edu)

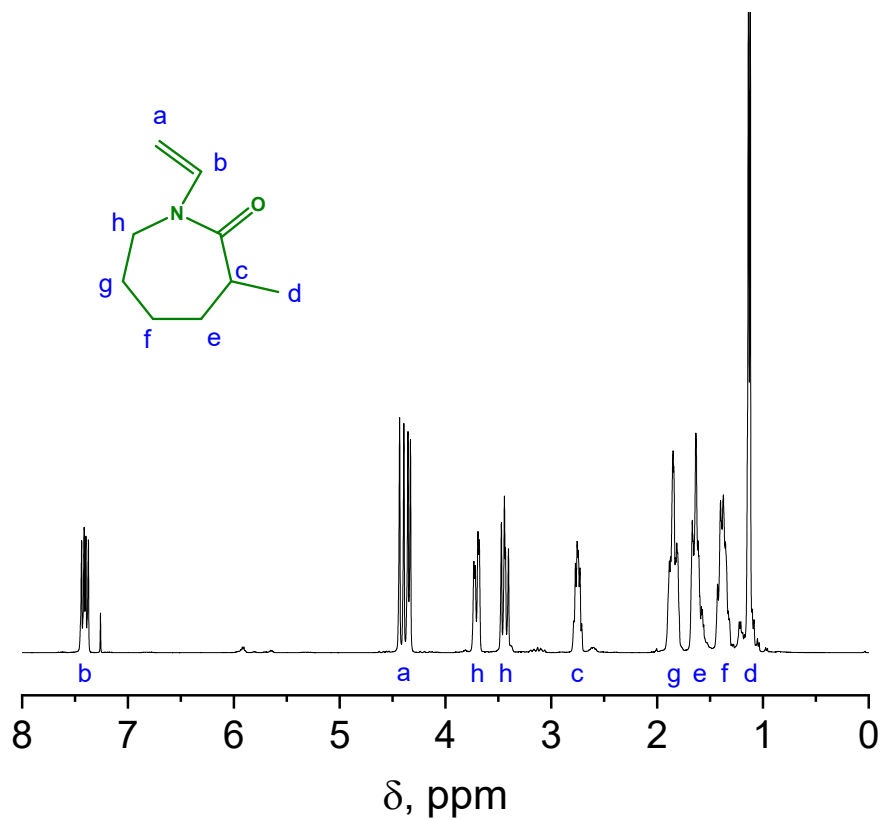

**Fig. S1.** <sup>1</sup>H NMR spectrum of 3-methyl-*N*-vinylcaprolactam monomer.

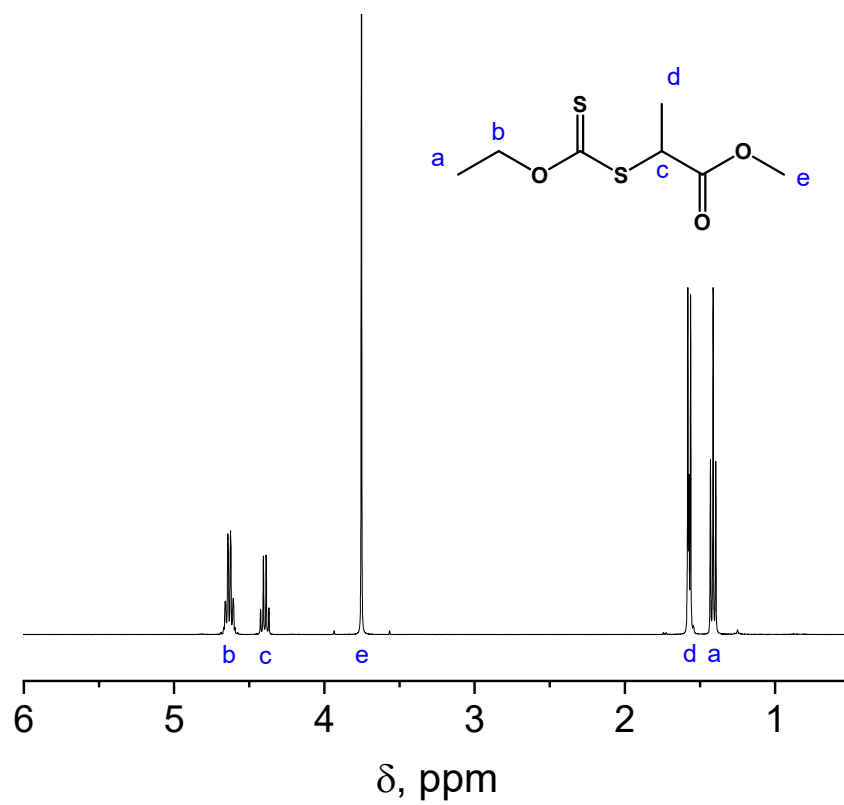

**Fig. S2.** <sup>1</sup>H NMR spectrum of RAFT chain transfer agent used for RAFT polymerization in this work.

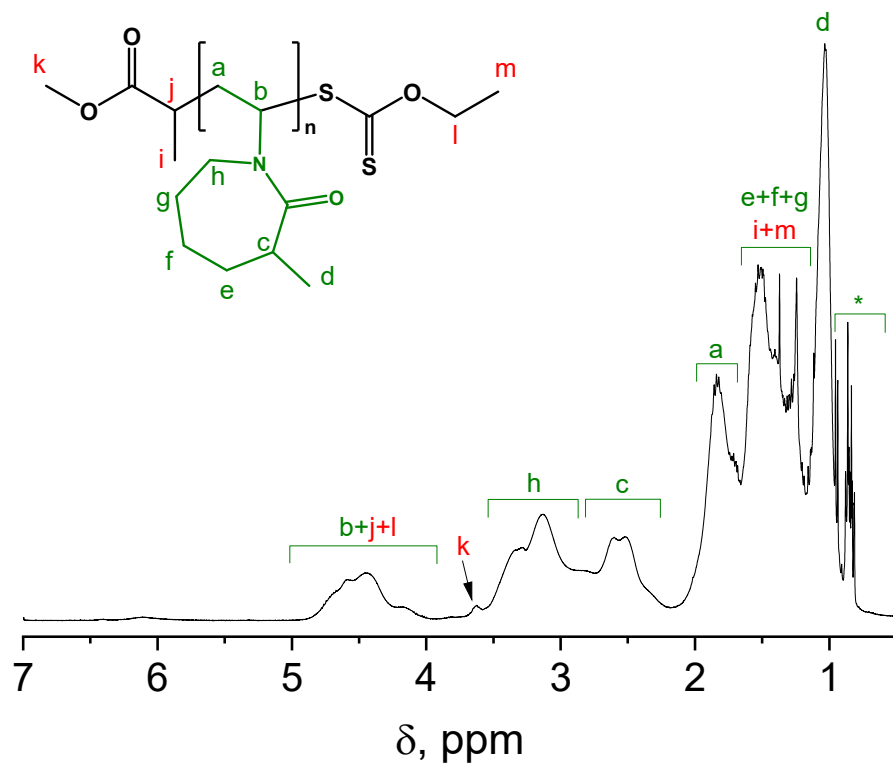

**Fig. S3.** Representative <sup>1</sup>H NMR spectrum of PMVC-CTA in CDCl<sub>3</sub>.

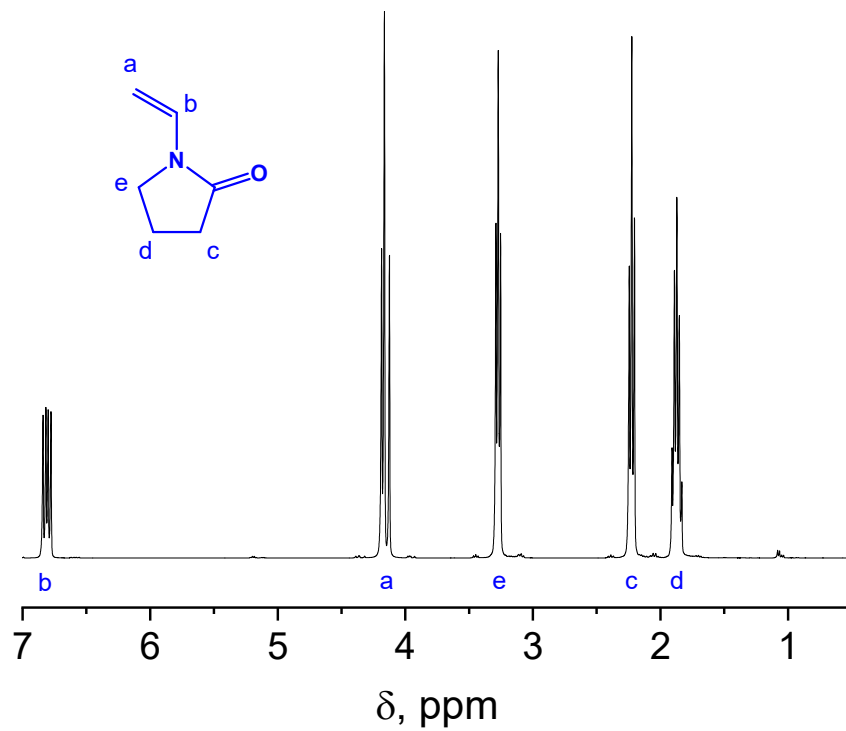

**Fig. S4.**  $^1\text{H}$  NMR spectrum of *N*-vinylpyrrolidone monomer.

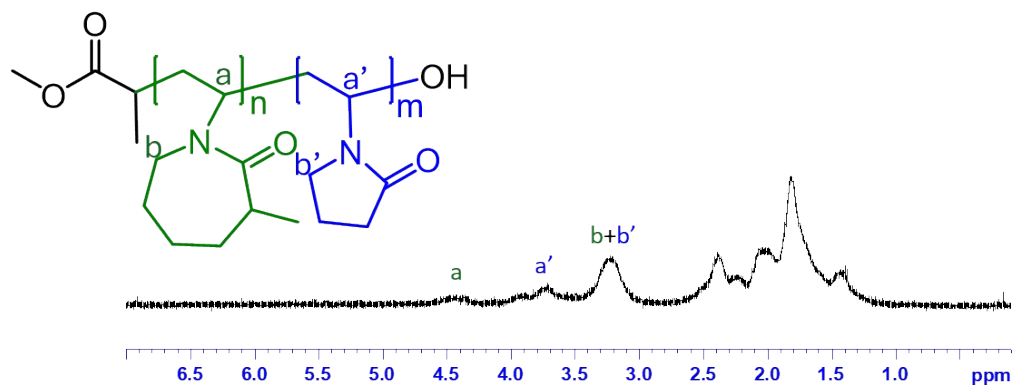

**Fig. S5.**  $^1\text{H}$  NMR spectrum of  $\text{PMVC}_{58}\text{-}b\text{-PVPON}_{65}$  diblock copolymer in  $\text{CDCl}_3$  at concentration of  $1\text{ mg mL}^{-1}$ .

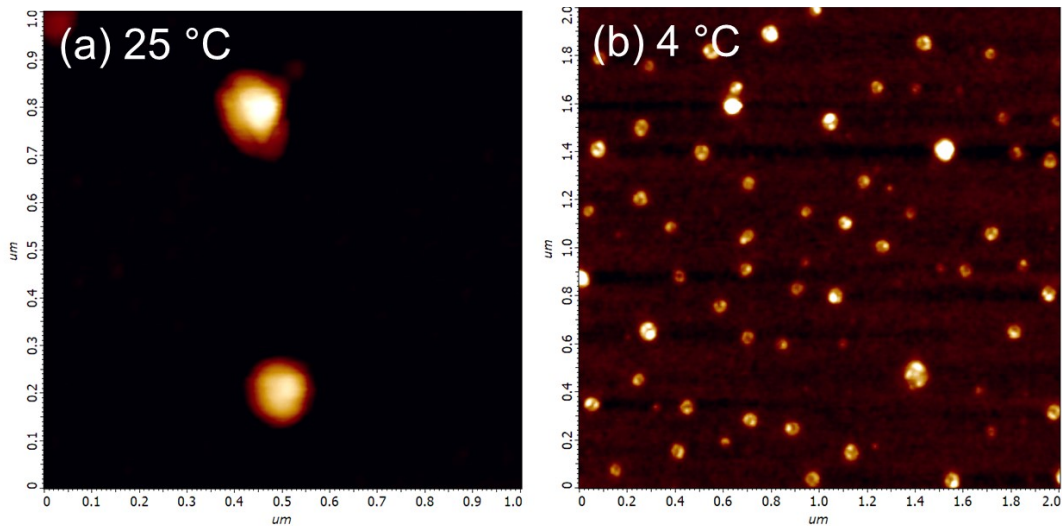

**Fig. S6.** AFM topography images of PMVC<sub>58</sub>-*b*-PVPON<sub>65</sub> diblock copolymer vesicles exposed to (a) 25 °C and (b) 4 °C for 12 hours and then adsorbed on TEM grid surfaces at the corresponding temperatures. The height (*z*)-scale is 36 nm in (a) and 5 nm in (b).
